# Supplementary material for: Proof-of-Concept Study of the NOTI Chelating Platform: Preclinical Evaluation of 64Cu-Labeled Mono- and Trimeric c(RGDfK) Conjugates
Source: PubMed Central journal article supplement (PMC7782405; doi:10.1007/s11307-020-01530-8), 2020-08-27
Supplement: 11307_2020_1530_MOESM1_ESM.pdf [file 11307_2020_1530_MOESM1_ESM.pdf]

**Proof-of-concept study of the NOTI chelating platform:  
Preclinical evaluation of <sup>64</sup>Cu-labeled mono- and trimeric  
c(RGDfK) conjugates**

**SUPPORTING INFORMATION**

Sebastian Martin<sup>1,3</sup>, Stephan Maus<sup>1</sup>, Tobias Stemler<sup>1</sup>, Florian Rosar<sup>1</sup>, Fadi Khreish<sup>1</sup>, Jason P.  
Holland<sup>4</sup>, Samer Ezziddin<sup>1</sup>, and Mark D. Bartholomä<sup>1,2\*</sup>

<sup>1</sup> Department of Nuclear Medicine, Saarland University – Medical Center, Kirrbergerstrasse,  
D-66421, Homburg, Germany

<sup>2</sup> Department of Nuclear Medicine, University of Freiburg – Medical Center, Hugstetterstrasse  
55, D-79106, Freiburg, Germany

<sup>3</sup> Department of Nuclear Medicine and Molecular Imaging, Lausanne University Hospital, Rue  
de Bugnon 25A, CH-1011 Lausanne, Switzerland

<sup>4</sup> Department of Chemistry, University of Zurich, Winterthurerstrasse 190, CH-8057, Zurich,  
Switzerland

**\* Corresponding Author:**

Dr. Mark D. Bartholomä

Tel: +49-(6841)-16-24664

Fax: +49-(6841)-16-24692

E-mail: mark.bartholomae@uks.eu

## Characterization data compound 4

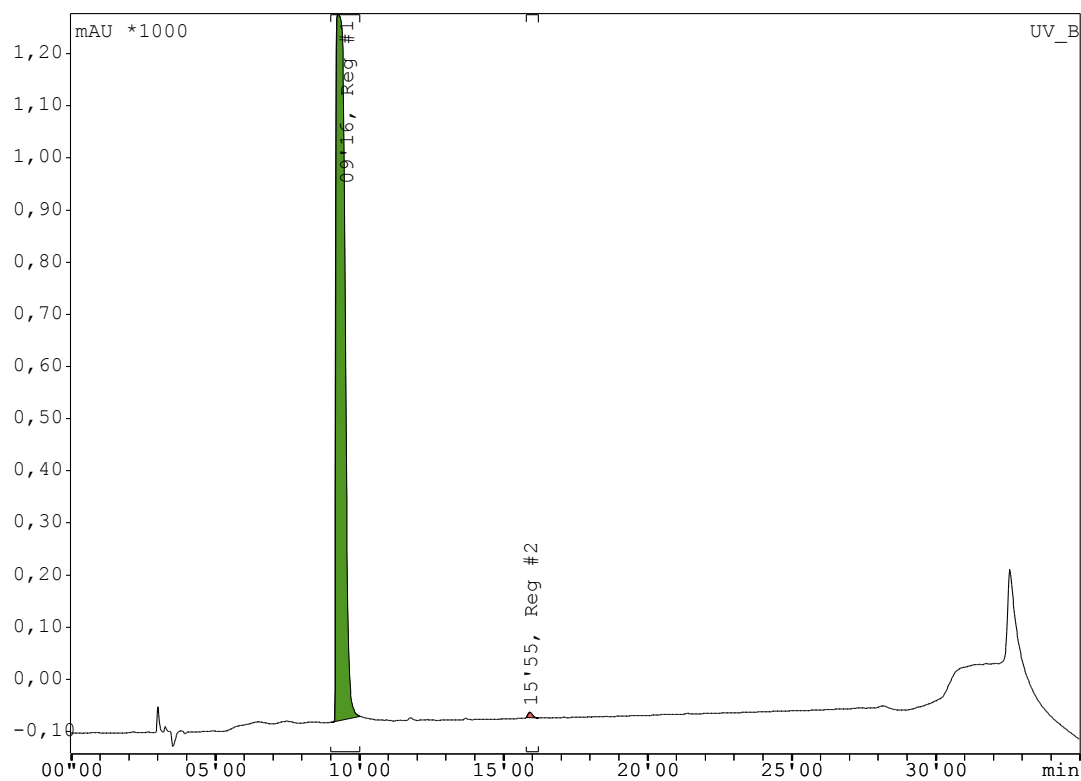

Figure S1. Representative analytical HPLC chromatogram of 4 (UV/vis trace).

D:\data\_2018\klind32s\_hr03

2/15/2018 2:54:48 PM

klind32s

klind32s\_hr03 #1 RT: 0.00 AV: 1 NL: 6.14E7  
T: FTMS + p ESI Full lock ms [50.00-700.00]

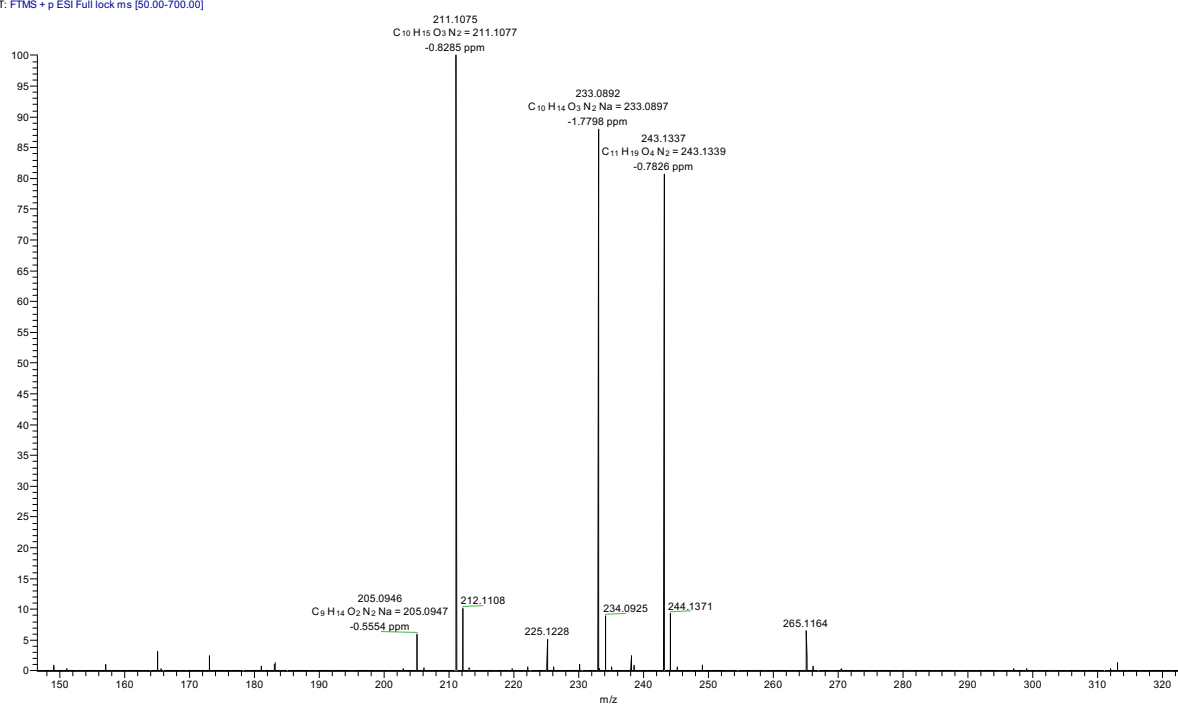

Figure S2. HR-ESI(+) spectrum of 4.

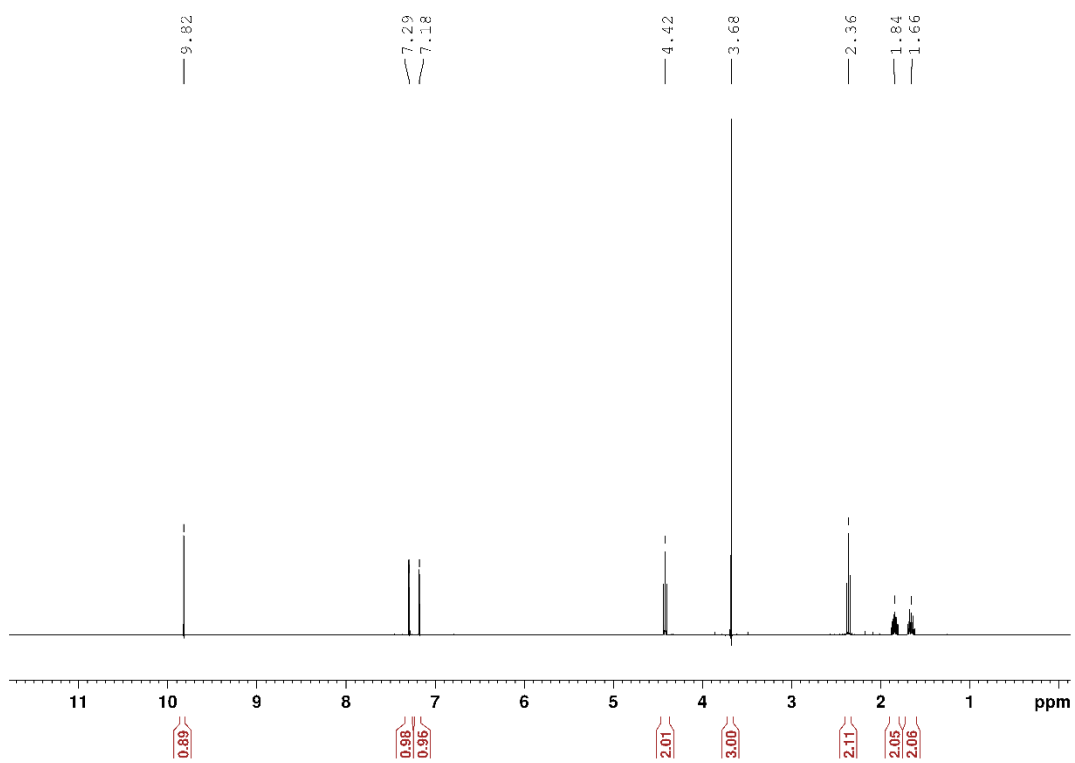

Figure S3. Proton NMR of 4.

## Characterization data compound 5

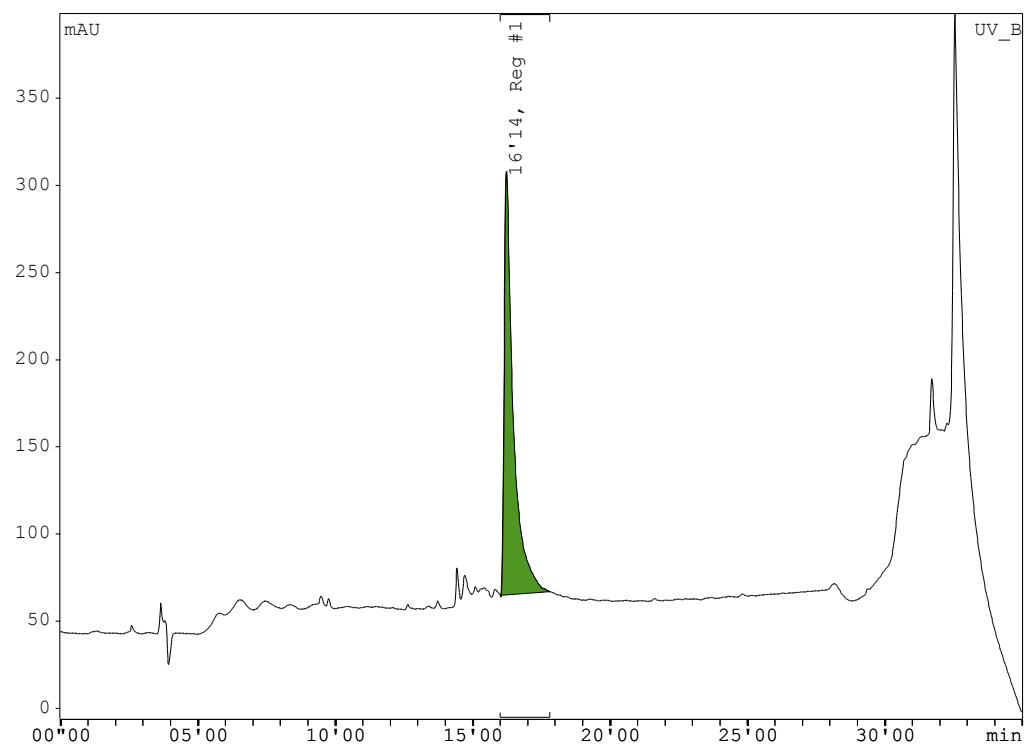

Figure S4. Representative analytical HPLC chromatogram of **5** (UV/vis trace).

D:\data\_2018\klind23s\_hr04

1/29/2018 10:26:51 AM

www.na.easter

klind23s\_hr04 #1 RT: 0.00 AV: 1 NL: 8.20E7  
T: FTMS + p ESI Full ms [100.00-2000.00]

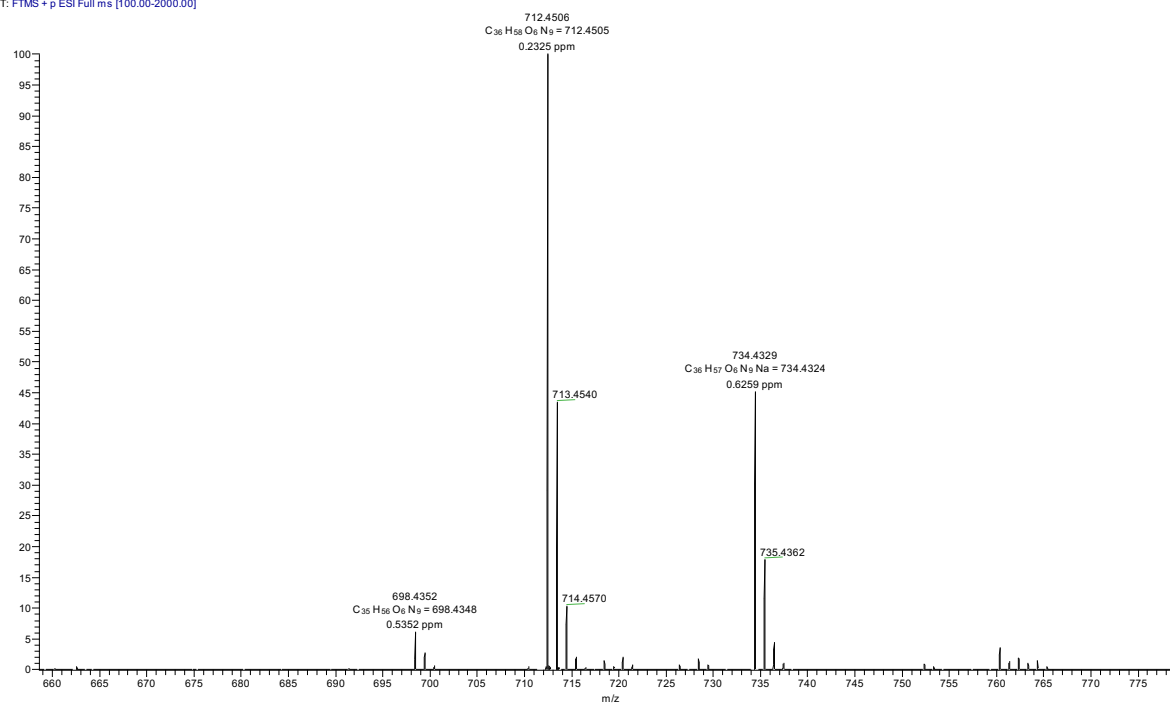

Figure S5. HR-ESI(+) spectrum of **5**.

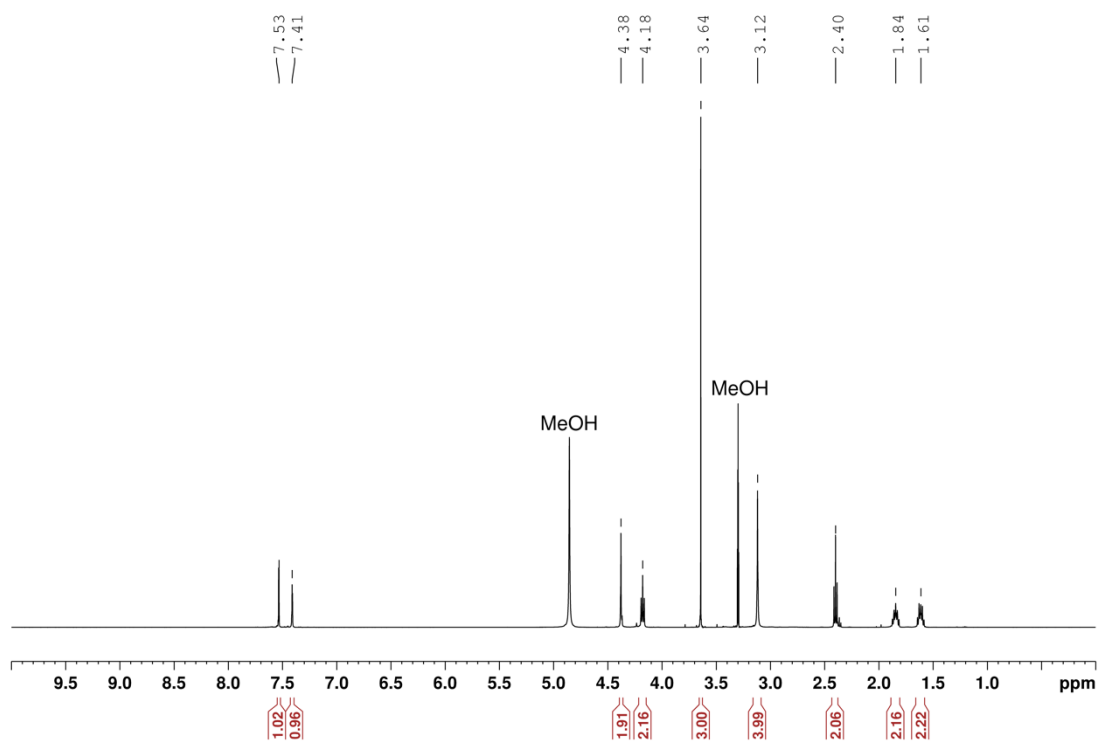

Figure S6. Proton NMR of **5**.

## Characterization data compound 6

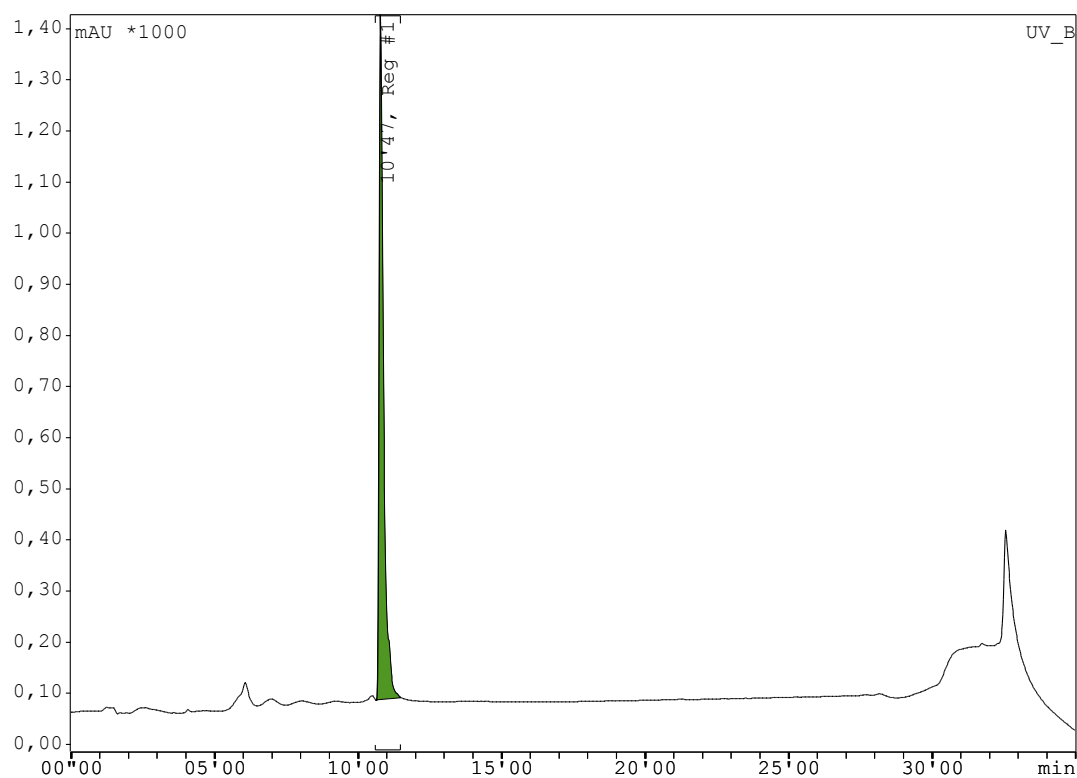

Figure S7. Representative analytical HPLC chromatogram of **6** (UV/vis trace).

D:\data\_2018\klind24s\_hr06

1/29/2018 10:36:36 AM

1102.NA

klind24s\_hr06 #1 RT: 0.00 AV: 1 NL: 1.84E6  
T: FTMS - p ESI sid=39.00 Full lock ms [100.00-1400.00]

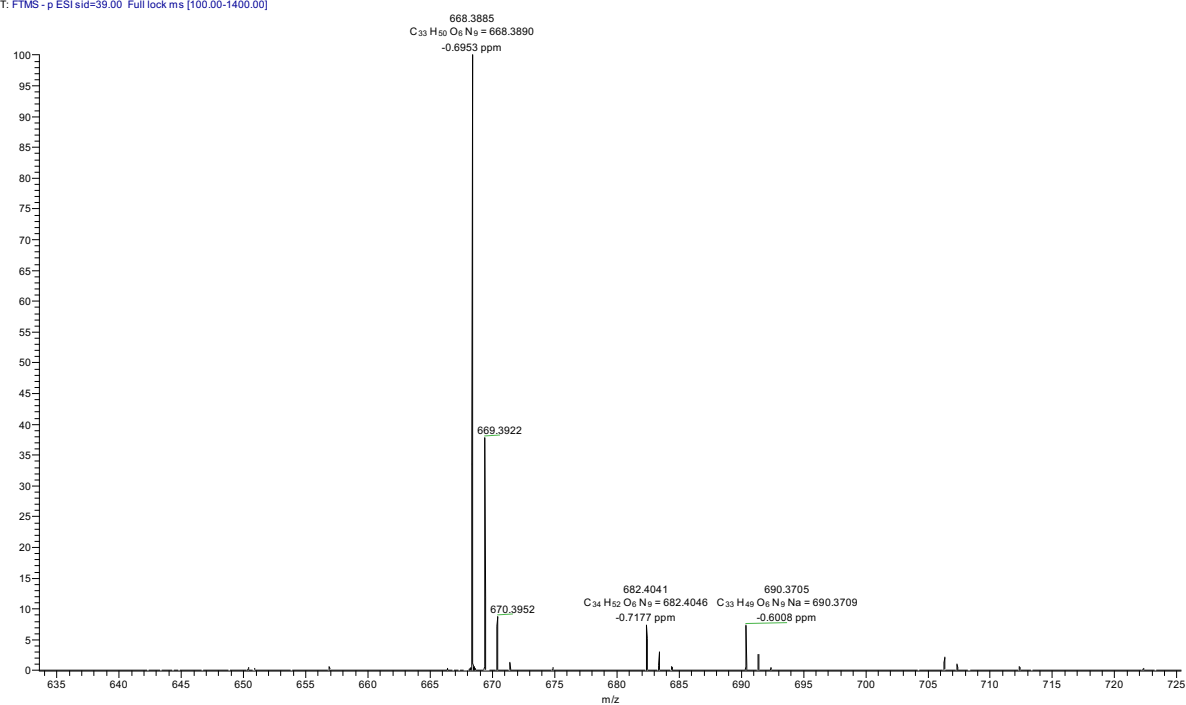

Figure S8. HR-ESI(+) spectrum of **6**.

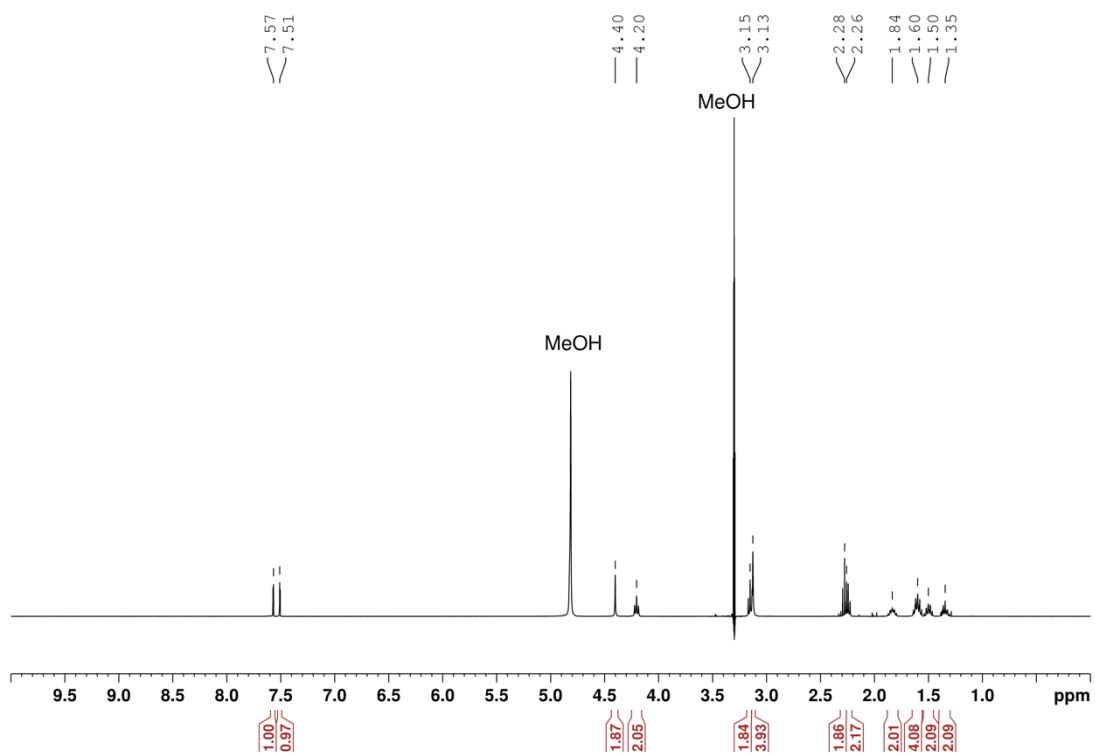

Figure S9. Proton NMR of **6**.

### Characterization data of Cu-8/[<sup>64</sup>Cu]Cu-8

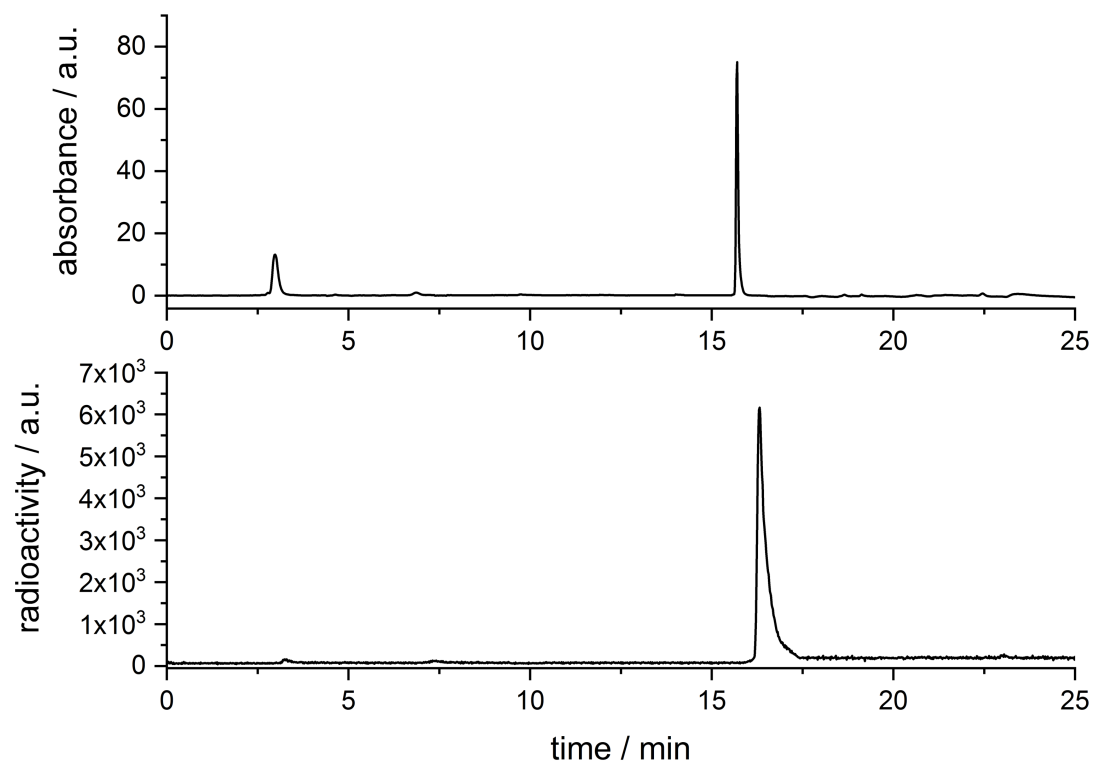

Figure S10. Representative analytical HPLC chromatograms of Cu-8 (UV/vis; top) and [<sup>64</sup>Cu]Cu-8 (radioactivity; bottom).



### Characterization data of Cu-9/[<sup>64</sup>Cu]Cu-9

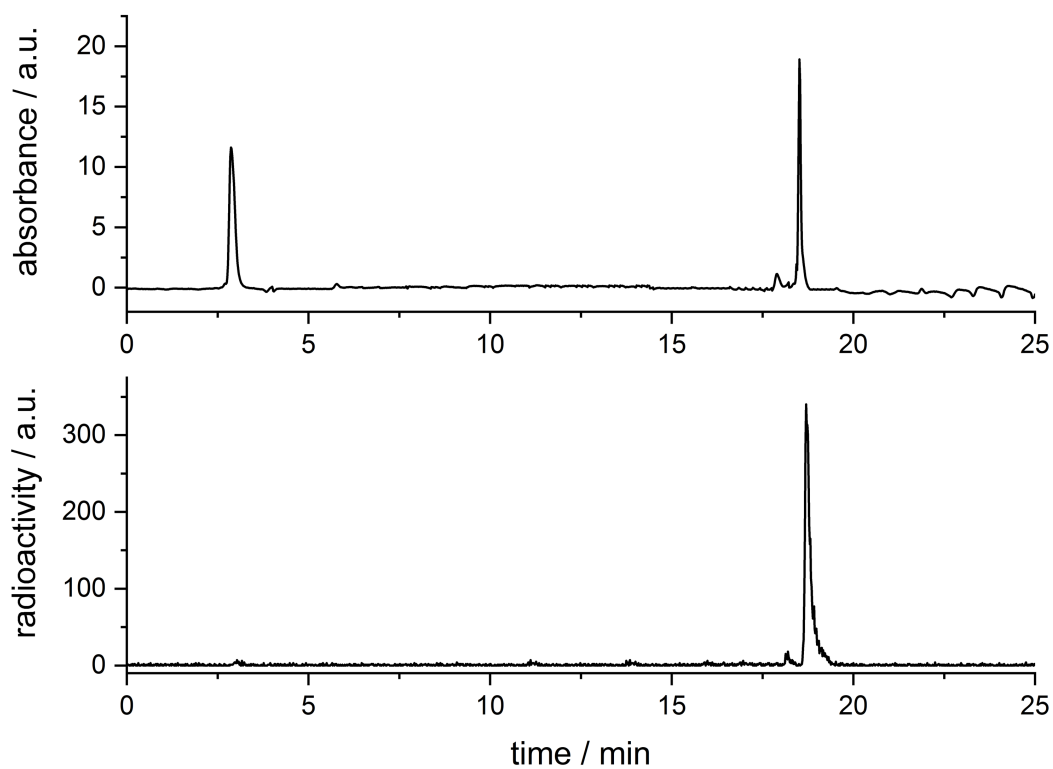

Figure S11. Representative analytical HPLC chromatograms of Cu-9 (UV/vis; top) and [<sup>64</sup>Cu]Cu-9 (radioactivity; bottom).

**Table S1.** *Ex vivo* biodistribution of [<sup>64</sup>Cu]Cu-8 and [<sup>64</sup>Cu]Cu-9 in mice bearing α<sub>v</sub>β<sub>3</sub>-positive U-87MG tumors at 1 h p.i. along with blocking studies. Data are expressed as %IA g<sup>-1</sup> and represent mean ± SD (*n* = 3).

| Organ           | [ <sup>64</sup> Cu]Cu-8 |              |                 | [ <sup>64</sup> Cu]Cu-9 |              |                 |
|-----------------|-------------------------|--------------|-----------------|-------------------------|--------------|-----------------|
|                 | 1 h                     | 1 h blockade | <i>P</i> value* | 1 h                     | 1 h blockade | <i>P</i> value* |
| Blood           | 0.16 ± 0.05             | 0.05 ± 0.02  | 0.0199          | 0.34 ± 0.05             | 0.27 ± 0.09  | 0.3042          |
| Heart           | 0.30 ± 0.02             | 0.06 ± 0.01  | 0.0001          | 1.03 ± 0.13             | 0.52 ± 0.07  | 0.0037          |
| Lung            | 0.50 ± 0.34             | 0.14 ± 0.13  | 0.1653          | 2.81 ± 0.53             | 1.52 ± 0.23  | 0.0186          |
| Spleen          | 0.72 ± 0.15             | 0.16 ± 0.01  | 0.0026          | 1.92 ± 0.24             | 0.65 ± 0.21  | 0.0011          |
| Liver           | 2.75 ± 0.05             | 1.79 ± 0.26  | 0.0034          | 5.63 ± 1.61             | 3.32 ± 0.09  | 0.0675          |
| Pancreas        | 0.30 ± 0.20             | 0.04 ± 0.01  | 0.0931          | 0.94 ± 0.37             | 0.46 ± 0.13  | 0.1038          |
| Stomach         | 1.41 ± 0.43             | 0.13 ± 0.07  | 0.0068          | 1.66 ± 1.23             | 0.66 ± 0.37  | 0.2493          |
| Intestine       | 0.73 ± 0.20             | 0.21 ± 0.05  | 0.0125          | 2.11 ± 1.15             | 1.73 ± 0.65  | 0.6462          |
| Kidney          | 2.67 ± 0.33             | 1.59 ± 0.15  | 0.0070          | 7.65 ± 0.52             | 5.45 ± 0.59  | 0.0084          |
| Muscle          | 0.28 ± 0.20             | 0.03 ± 0.01  | 0.0923          | 0.41 ± 0.06             | 0.29 ± 0.27  | 0.5046          |
| Bone            | 0.35 ± 0.08             | 0.09 ± 0.03  | 0.0206          | 0.66 ± 0.23             | 0.38 ± 0.13  | 0.1289          |
| Tumor           | 2.30 ± 0.28             | 0.26 ± 0.02  | 0.0002          | 5.57 ± 0.83             | 2.24 ± 0.11  | 0.0024          |
| Tumor-to-blood  | 14.99 ± 3.05            |              |                 | 16.22 ± 0.20            |              |                 |
| Tumor-to-kidney | 0.86 ± 0.04             |              |                 | 0.73 ± 0.11             |              |                 |
| Tumor-to-liver  | 0.83 ± 0.10             |              |                 | 1.03 ± 0.26             |              |                 |
| Tumor-to-muscle | 10.53 ± 4.79            |              |                 | 14.08 ± 3.83            |              |                 |

\* statistical analysis of normal vs. blocking group using unpaired two-tailed t-test.
